# Supplementary material
Source: publisher site journal article supplement (https://www.spandidos-publications.com/186/downloadSupplementary)

Figure S1. Pathway and process enrichment analysis of two modules. (A) Enriched pathways of module 1. (B) Enriched pathways of module 2. The modules are colored by cluster ID.

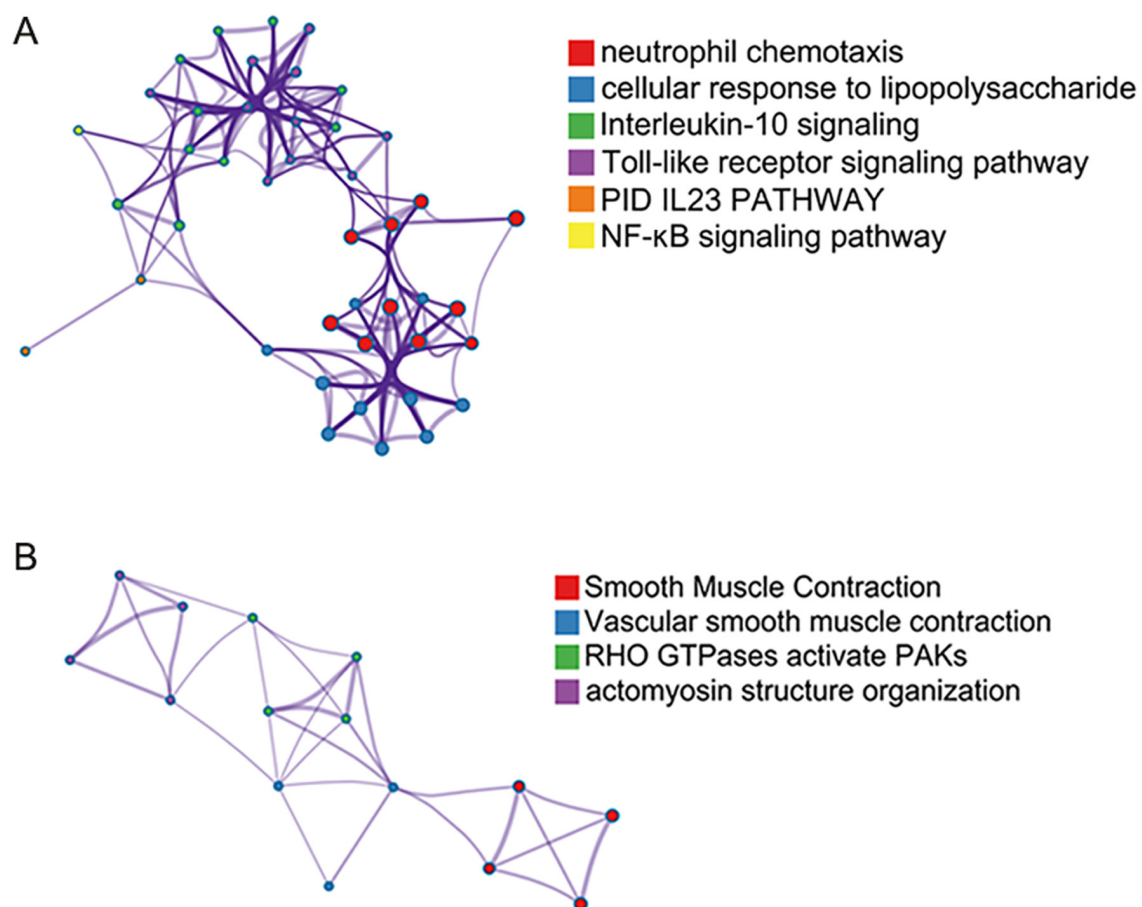

Figure S2. Network of DE miRNAs and their targets screened through the TarBase v.8 and miTarBase databases. Rectangle, DE miRNA; ellipse, target of DE miRNA; red, downregulated expression; blue, upregulated expression. DE, differentially expressed; miRNA, microRNA.

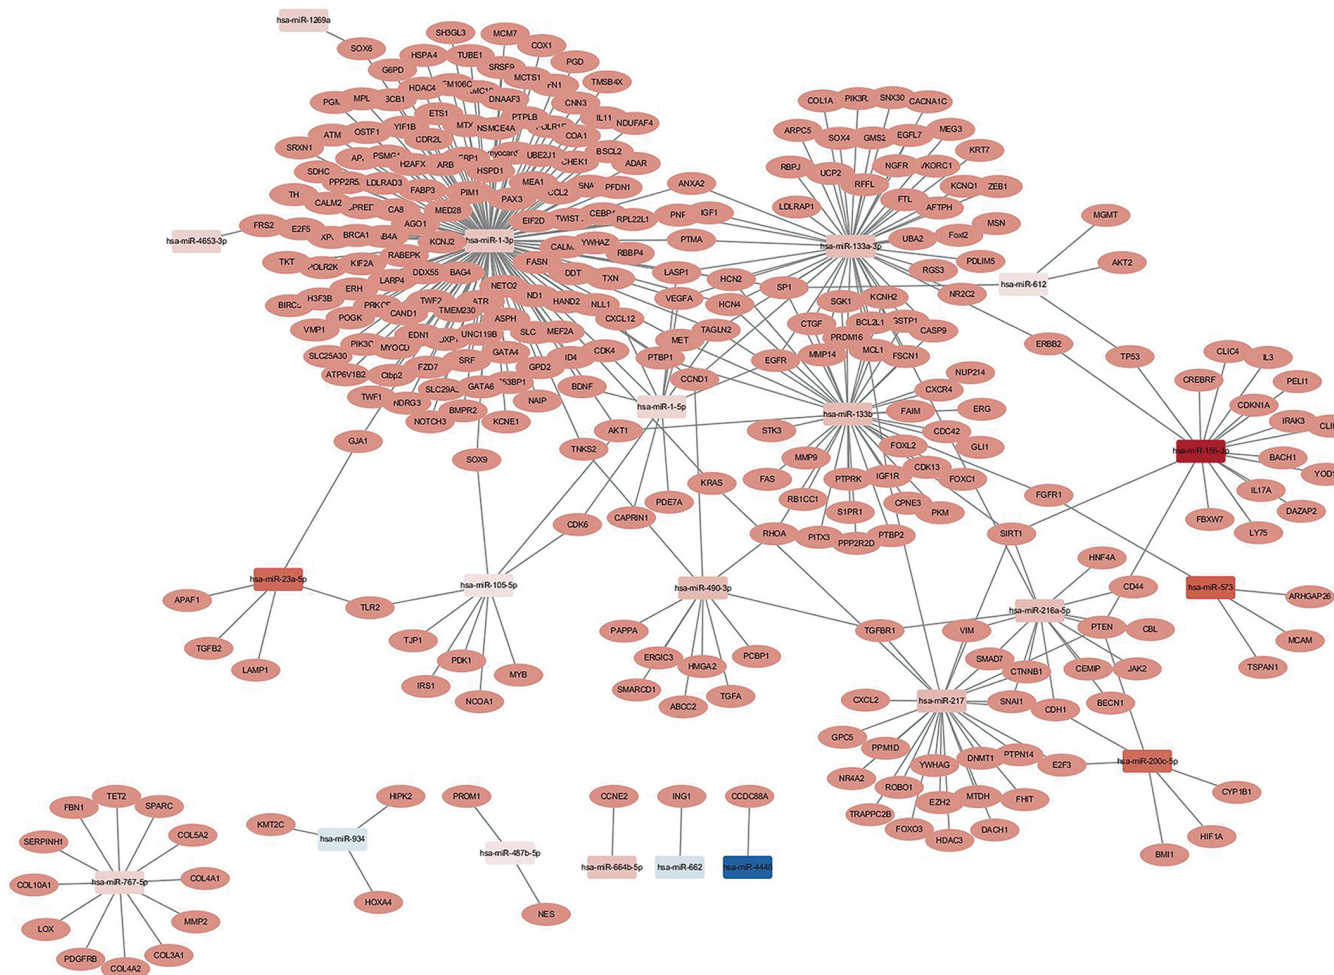

Supplement: Supplementary file 1 [file downloadSupplementary]
